# Supplementary material
Source: HighWire-hosted journal article supplement (http://qualitysafety.bmj.com/highwire/filestream/147298/field_highwire_adjunct_files/0/bmjqs-2011-000191-s1.pdf)
Supplement: bmjqs-2011-000191-s1.pdf [file bmjqs-2011-000191-s1.pdf]

## Appendices

The following tables present detailed information on each study analysed.

Appendix table 1. Publications on the economic burden of adverse events

| Publication                   | Perspective          | Adverse events (AEs)                    | Sample characteristics                                                                                 | Cost data sources                                  | Components of hospital costs                                                                    | Cost calculation methods                                                                                         | Sensitivity analysis?            |
|-------------------------------|----------------------|-----------------------------------------|--------------------------------------------------------------------------------------------------------|----------------------------------------------------|-------------------------------------------------------------------------------------------------|------------------------------------------------------------------------------------------------------------------|----------------------------------|
| Cosgrove and al., 2005[24]    | HCO*                 | MRSA† BSI†                              | 1 tertiary university hospital, 630 beds, 40 000 average annual admissions, 348 MRSA infected patients | Total billed charges (Tariffs)                     | Gross estimation of average daily cost                                                          | 1) Tariff-to-cost conversion; 2) IC <sup>†</sup> =total cost - cost from the diagnosis of AEs                    | No                               |
| de Lissovoy and al., 2009[25] | Not stated (HCO)     | SSI** in various surgery categories     | 723 940 nationally representative stays, 6 891 SSI cases                                               | Total billed charges (Tariffs)                     | Gross estimation of whole-stay cost                                                             | 1) Propensity score of SSI for matching; 2) Tariff-to-cost conversion; 3) IC=linear regression                   | No                               |
| Dietrich and al., 2002[26]    | HCO + public insurer | Healthcare associated pneumonia         | 1 hospital, 2 ICU <sup>††</sup> , 437 eligible patients, 37 pairs included                             | HCO financial services + medical records (volumes) | Average daily and total costs in both ICU and general ward                                      | 1) Resources consumption for diagnosis, treatment, nursing and stay; 2) Matched comparison of cases and controls | No                               |
| Eber and al., 2010[27]        | HCO                  | BSI and Healthcare associated pneumonia | 58 701 608 nationally representative stays, 557 967 cases of healthcare associated pneumonia or BSIs   | Total billed charges (Tariffs)                     | Gross estimation of whole-stay cost                                                             | Matched comparison of cases and controls                                                                         | Yes, on cost calculation methods |
| Gianino, and al., 2007[28]    | HCO                  | Various HAIs <sup>**</sup>              | Surveillance data from an Italian region                                                               | HCO financial services + medical records (volumes) | Average daily costs if LOS <sup>†††</sup> was prolonged or treatment and nursing charges if not | Stochastic linear model                                                                                          | No                               |

Economic evaluation in patient safety: a literature review of methods - appendices

| Publication                     | Perspective      | Adverse events (AEs)            | Sample characteristics                                                                                                                                              | Cost data sources                                  | Components of hospital costs                                                                                                           | Cost calculation methods                                                                                                               | Sensitivity analysis?                          |
|---------------------------------|------------------|---------------------------------|---------------------------------------------------------------------------------------------------------------------------------------------------------------------|----------------------------------------------------|----------------------------------------------------------------------------------------------------------------------------------------|----------------------------------------------------------------------------------------------------------------------------------------|------------------------------------------------|
| Graves and al., 2003[29]        | Private insurer  | All HAIs                        | a) 32 179 medical stays, 24 899 surgical stays from a single hospital group b) nationally representative sample of 162 879 medical stays and 245 130 surgical stays | a) HCO financial services; b) published data       | Gross estimation of both average daily and average total cost                                                                          | Mean cost=HAI incidence*extra LOS*opportunity cost (mean daily cost)                                                                   | Yes, on input variables in cost calculation    |
| Herwaldt and al., 2006[30]      | Not stated (HCO) | Postoperative infections        | 1 tertiary university hospital, 3 surgical units, 3 864 eligible patients, 438 SSIs                                                                                 | Not stated (reference to published data)           | Excess LOS, healthcare resource use (drugs, readmission), mortality<br>Direct inpatient cost (not stated, reference to published data) | Not stated (reference to published data)                                                                                               | No                                             |
| Hoonhout and al., 2009[31]      | Not stated (HCO) | All types of AEs                | Nationally randomized representative sample, 21 hospitals, 200 deceased and 200 non deceased patients from each hospital                                            | Published (official) tables                        | Average daily costs + specific diagnostic and treatment procedures                                                                     | 1) AE during hospitalization: average costs*attributable LOS; 2) AE cause of in-hospital admission: average costs*national average LOS | Yes, on the estimation of the attributable LOS |
| Kilgore and Brossette, 2008[32] | Not stated (HCO) | BSIs                            | 55 voluntary hospitals, 1 355 647 eligible stays, 12 578 cases of bloodstream infections                                                                            | Laboratory and HCO financial services              | Not stated                                                                                                                             | Absorbing (linear) regression                                                                                                          | Yes, on the LOS                                |
| Kim and al., 2002[33]           | HCO              | SARM colonisation and infection | 1 tertiary hospital, 16800 eligible stays, 94 cases included                                                                                                        | HCO financial services + medical records (volumes) | Average daily cost from nursing time, diagnostic procedures, treatment (standardized method, fixed costs included)                     | 1) AE during hospitalization: daily costs*attributable LOS; 2) AE cause of in-hospital admission: whole-stay costs                     | No                                             |

Economic evaluation in patient safety: a literature review of methods - appendices

| Publication                         | Perspective      | Adverse events (AEs)                       | Sample characteristics                                                                                                 | Cost data sources                                          | Components of hospital costs                                                                                           | Cost calculation methods                                                                                                                                                                                                                 | Sensitivity analysis? |
|-------------------------------------|------------------|--------------------------------------------|------------------------------------------------------------------------------------------------------------------------|------------------------------------------------------------|------------------------------------------------------------------------------------------------------------------------|------------------------------------------------------------------------------------------------------------------------------------------------------------------------------------------------------------------------------------------|-----------------------|
| Larue and al., 2009[34]             | HCO              | Healthcare associated SARM pneumonia       | 1 tertiary university hospital, 6 UCI, 23 cases of MRSA pneumonia (21 matched and included)                            | Official tables for medication + medical records (volumes) | Diagnostic/therapeutic procedures, surgical or invasive acts                                                           | Omega score+++ = $[(45(\Omega_1) + 106(\Omega_2) + 16(\Omega_3) + 4703K + 191)]^*$ 1,2), where $\Omega_i$ are diagnostic/therapeutic procedures used and $K = 1$ if surgical or invasive acts were performed. Values are given in euros. | No                    |
| Plowman and al., 2001[35]           | Not stated (HCO) | All HAIs                                   | 1 secondary hospital (579 beds), 5 909 eligible stays (68% recruited), 309 HAI cases                                   | HCO financial services + medical records (volumes)         | Average daily cost from fixed and variable costs for diagnostic, treatment, nursing and accommodation                  | 1) In the sample: multivariate linear regression; 2) Nationwide estimates = $NiC(r-1)$ where $N$ =number of in-hospital stays, $i$ =incidence of HAI, $r$ =cost of infected/cost of non-infected patients ratio                          | No                    |
| Sanchez-Velazquez and al., 2006[36] | Not stated (HCO) | All HAIs in the ICU                        | 1 tertiary hospital, 1 ICU, 695 eligible patients, 43 cases (94% successful matching)                                  | Medical records (volumes); prices: not stated              | Average daily cost in ICU and in general ward                                                                          | Matched comparison of cases and controls                                                                                                                                                                                                 | No                    |
| Sheng and al., 2005[37]             | HCO              | All HAIs                                   | 1 tertiary teaching hospital, 2 000 beds, 60 000 - 70 000 eligible stays/year. Inclusion of 50 % of the HAI identified | HCO financial services                                     | Accommodation (emergency, general ward and ICU), diet, medication, medical devices, laboratory, nursing and procedures | Matched comparison of cases and controls                                                                                                                                                                                                 | No                    |
| Vargas and al., 2003[38]            | Not stated (HCO) | Medication associated AEs in surgical ICUs | 1 hospital, 3 surgical units, 401 eligible patients, 37 included                                                       | Medical records                                            | Attributable (extra) LOS                                                                                               | Extra LOS was not valued                                                                                                                                                                                                                 | N/A                   |

Economic evaluation in patient safety: a literature review of methods - appendices

| Publication                    | Perspective      | Adverse events (AEs)                          | Sample characteristics                                                                        | Cost data sources              | Components of hospital costs                                                                          | Cost calculation methods                 | Sensitivity analysis?                             |
|--------------------------------|------------------|-----------------------------------------------|-----------------------------------------------------------------------------------------------|--------------------------------|-------------------------------------------------------------------------------------------------------|------------------------------------------|---------------------------------------------------|
| Weber and al., 2008[39]        | HCO + patients   | SSI                                           | 1 hospital, 3 surgical units, 6283 eligible stays, 183 cases included                         | HCO financial services         | Average daily cost from fixed and variable costs for diagnostic, treatment, nursing and accommodation | Matched comparison of cases and controls | No                                                |
| Wilson and al., 2004[40]       | HCO              | <i>Acinetobacter baumannii</i> in a burn unit | 1 tertiary university hospital, 1 specialized burnt unit, 217 eligible stays, 34 cases of HAI | Total billed charges (Tariffs) | Average whole-stay costs                                                                              | Matched comparison of cases and controls | Yes, on the tariff-to-cost conversion coefficient |
| Wisplinghoff and al., 2003[41] | Not stated (HCO) | BSI in adult neutropenic patients             | 1 hospital, 1 specialized medical unit, 417 eligible patients, 84 cases included              | Total billed charges (Tariffs) | Average whole-stay costs                                                                              | Not stated                               | No                                                |

\*HCO: Healthcare organisation

†MRSA: Methicillin resistant *Staphylococcus aureus*

‡BSI: Blood stream infection (sepsis)

‡CLABSI: Central line associated blood stream infection

¶IC: Incremental cost

\*\*SSI: Surgical site infection

††ICU: Intensive care unit

‡‡HAI: Healthcare associated infection

‡‡LOS: Length of stay

¶¶CAUTI: Catheter associated urinary tract infection

\*\*\*VAP: Ventilator associated pneumonia

†††: Omega score is a validated tool that allows for estimating the average cost of standardized diagnostic and therapeutic acts. Detailed information on this score is described elsewhere. Chaix C, Durand-Zaleski I, Alberti C, et al. A model to compute the medical cost of patients in intensive care. *Pharmacoeconomics* 1999;15:573–82.

Appendix table 2. Publications on the cost of safety practices.

| Publication               | Perspective         | Sample characteristics                                                                       | Patient safety practices                                                                            | Output measures                    | Cost categories                                                                                     | Cost data sources           |
|---------------------------|---------------------|----------------------------------------------------------------------------------------------|-----------------------------------------------------------------------------------------------------|------------------------------------|-----------------------------------------------------------------------------------------------------|-----------------------------|
| Fukuda and al., 2008a[42] | HCO*                | 7 tertiary university hospitals                                                              | Various types of patient-safety actions ("patient safety systems") and infection control activities | Activity level                     | Personnel (time spent on patient-safety meetings or actions), rooms and material for staff meetings | Hospital financial services |
| Fukuda and al., 2008b[43] | HCO, public insurer | Risk managers and hygienists of the whole country's teaching hospitals (40.2% response rate) | Various types of patient-safety actions                                                             | Activity level                     | Personnel (time spent on patient-safety meetings or actions)                                        | Hospital financial services |
| Stone and al., 2007[44]   | Not stated (HCO)    | 40 volunteer hospitals from the CDC <sup>‡</sup> NNIS <sup>¶</sup>                           | Implementation of the 2002 CDC* recommendations for hand hygiene                                    | Rate of compliance with guidelines | Hygiene products and other implementation costs (staff time, educational material)                  | Hospital financial services |

\*CDC=Centers for Disease Control and Prevention

Economic evaluation in patient safety: a literature review of methods - appendices

Appendix table 3. Complete economic evaluations of patient safety practices.

| Publication                 | Adverse events (AE)                                                | Sample characteristics                                                                                           | Patient safety practice                                                                                        | Evaluation method                            | Perspective          | Outcome measure(s)                                                                                                           | Efficacy data sources                                    | Economic data sources and categories                                                                                                                                                                                                                                                         | Sensitivity analysis?                                               |
|-----------------------------|--------------------------------------------------------------------|------------------------------------------------------------------------------------------------------------------|----------------------------------------------------------------------------------------------------------------|----------------------------------------------|----------------------|------------------------------------------------------------------------------------------------------------------------------|----------------------------------------------------------|----------------------------------------------------------------------------------------------------------------------------------------------------------------------------------------------------------------------------------------------------------------------------------------------|---------------------------------------------------------------------|
| Brown and al., 2009[45]     | All HAI*s                                                          | Multiple data sources: a) 15 experts opinions b) published data                                                  | Intensive cleaning of all hospital wards in a national level                                                   | Cost-utility and cost-benefit analysis       | HCO+, public insurer | QALYs++ gained per HAI avoided, cost per HAI avoided, net cost of the strategy                                               | Expert opinion                                           | 1) Strategy: official allocated amounts + NHS payments to HCO (opportunity costs); 2) HAIs: Published data                                                                                                                                                                                   | Yes, on the incidence of AEs, efficacy and input economic variables |
| Calugar and al., 2006[46]   | Nosocomial pertussis outbreak                                      | Survey of hospital Data collected in the hospital during the outbreak of the pertussis (17HCW, 307 patients).    | Mandatory vaccination of in-hospital HCW (versus outbreak control)                                             | Cost-effectiveness and cost-benefit analysis | HCO, HCW±            | Cases and complications avoided amongst HCW and contacts, number of outbreaks avoided for the vaccination to be cost-neutral | Published data                                           | Hospital direct (diagnosis, prophylaxis, treatment) and indirect (lost personnel working hours) costs: billing records; 2) Personnel direct (lost wages and uncompensated care expenses) and indirect (lost leisure time) costs: interviews + published data; 3) Vaccination: published data | Yes, on expositions to pertussis and contact rates, on HCW turnover |
| Harbrecht and al., 2006[47] | Postoperative respiratory complications in selected surgical wards | 1 hospital, 1 surgical unit, 2230 stays before implementation of the action and 2805 stays after implementation. | Implementation of a RT-driven patient-assessment scale and protocolled interventions on postoperative patients | Cost-effectiveness analysis                  | HCO                  | Number of treatments, number of ICU <sup>i</sup> admissions, length of stay, mortality, total hospital costs and charges     | Empirical data (from the implementation and 8 months on) | 1) Resource utilization: medical records (standardized collection); 2) Valuation: HCO financial services                                                                                                                                                                                     | No                                                                  |

*Economic evaluation in patient safety: a literature review of methods - appendices*

|                              |                                            |                                                                                |                                                                                                              |                                        |               |                                                                                                             |                |                                                                                                                                              |                                                                                                       |
|------------------------------|--------------------------------------------|--------------------------------------------------------------------------------|--------------------------------------------------------------------------------------------------------------|----------------------------------------|---------------|-------------------------------------------------------------------------------------------------------------|----------------|----------------------------------------------------------------------------------------------------------------------------------------------|-------------------------------------------------------------------------------------------------------|
| Karnon and al., 2008[48]     | Medication-associated AEs                  | Published data                                                                 | Three patient safety practices were considered separately: CPOE¶, additional ward pharmacists and bar coding | Cost-utility and cost-benefit analysis | HCO, societal | Number of AEs averted, QALYs per AE averted, net benefits resulting from the three patient safety practices | Published data | Published data (total costs estimation with Markov modelling by Monte Carlo technique using the lower and upper borders of cost information) | No                                                                                                    |
| Kopp and al., 2007[49]       | Medication-associated AEs in surgical ICUs | 1 tertiary university hospital (360 beds), 1 ICU, 129 individual interventions | Multiple interventions of a critical care pharmacists in an ICU                                              | Cost-effectiveness analysis            | HCO           | Number of AEs averted, costs averted by each intervention                                                   | Expert opinion | Published data                                                                                                                               | No                                                                                                    |
| Nuckols and Scarce, 2005[50] | All types of AEs                           | Published data                                                                 | National reduction of medical residents work-hours load                                                      | Cost-benefit analysis                  | HCO, societal | Number of AEs averted, rate of AE reduction for the intervention to be cost-neutral                         | Published data | 1) Frequency and costs of AEs: Published data; 2) Wages, work-hours reduction: official sources                                              | Yes, on AEs incidence and costs, patient safety practice effectiveness, personnel wages / categories) |

*Economic evaluation in patient safety: a literature review of methods - appendices*

|                                   |             |                                                                                                                                     |                                                             |                             |     |                                                                                                                                       |                                                          |                                                                                                                                                                                                                                                                                                                                                                      |    |
|-----------------------------------|-------------|-------------------------------------------------------------------------------------------------------------------------------------|-------------------------------------------------------------|-----------------------------|-----|---------------------------------------------------------------------------------------------------------------------------------------|----------------------------------------------------------|----------------------------------------------------------------------------------------------------------------------------------------------------------------------------------------------------------------------------------------------------------------------------------------------------------------------------------------------------------------------|----|
| Rapp and al., 2004[51]            | All HAIs    | 1 tertiary hospital (430 beds), all admissions included                                                                             | Single fluoroquinolone-use policy                           | Cost-effectiveness analysis | HCO | Susceptibility rates of multiple pathogens to the fluoroquinolone used, policy acceptance by the medical staff, costs to the hospital | Empirical data from the implementation and 1 year on     | Hospital accounting system (costs of the fluoroquinolones before and after implementation)                                                                                                                                                                                                                                                                           | No |
| Van Rijen and Kluytmans, 2009[52] | MRSA HAIs   | 1 tertiary university hospital (1370 beds), 39 943 patients/year and 282 585 hospitalization days/year (mean values)                | Search and destroy policy (implemented in a national level) | Cost-benefit analysis       | HCO | Multiple activity (output) indicators, MRSA infections averted                                                                        | Comparison between actual incidence and published values | 1) Hospital accounting system: fixed costs: pressure-controlled isolation rooms and the salary of an infection-control practitioner; variable costs: screening, diagnosis, isolation-associated costs (cases and contacts, amongst which HCWs administrative leaves); 2) Published data (counterfactual): treatment, costs of MRSA outbreaks if the policy is absent | No |
| Vriens and al., 2002[53]          | MRSA** HAIs | 1 tertiary university hospital, 1045 eligible "at risk" patients, 38 in hospital and 16 ambulatory patients included. 16 outbreaks. | Search and destroy policy (implemented in a national level) | Cost-effectiveness analysis | HCO | Multiple activity (output) indicators, MRSA infections averted                                                                        | Comparison between actual incidence and published values | 1) Hospital accounting system: variable costs only: screening, diagnosis, isolation-associated costs, replacement of HCWs on administrative leave, income loss for HCWs; 2) Published data (counterfactual): cancelled surgical procedures, wards/beds closure.                                                                                                      | No |



Economic evaluation in patient safety: a literature review of methods - appendices

|                         |                                  |                                                                                                                                                                                                |                                                                              |                             |                 |                                                                                                   |                               |                                                                                                                                                                 |                                                                                  |
|-------------------------|----------------------------------|------------------------------------------------------------------------------------------------------------------------------------------------------------------------------------------------|------------------------------------------------------------------------------|-----------------------------|-----------------|---------------------------------------------------------------------------------------------------|-------------------------------|-----------------------------------------------------------------------------------------------------------------------------------------------------------------|----------------------------------------------------------------------------------|
| Wang and all, 2003[54]  | All types of AEs in primary care | Multiple data sources: a) primary care provider (2500 patients); b) Published data                                                                                                             | Electronic medical records implementation                                    | Cost-benefit analysis       | Private insurer | Drug expenditure, improvement in utilisation of medication and radiology tests, total net benefit | Published data                | 1)Empirical data: implementation of the strategy (fixed material and software costs, loss of productivity); 2)Published data and experts opinion: averted costs | Yes, on the number of patients, capitation rate, averted costs, discounting rate |
| Weeks and al., 2001[55] | Medication-associated AEs        | 172 hospitals from the Veteran Affairs Administration, 27 volunteer units<br>Multiple data sources: a) 1 hospital group (700 beds), 27800 stays (all the patients included), b) Published data | Staff training for improvement of medication prescription and administration | Cost-effectiveness analysis | Private insurer | Frequency of life-threatening medication associated adverse events                                | Insurer's surveillance system | 1) Empirical data: staff meetings for educational purposes, litigation costs; 2)Published data: treatment costs                                                 | Yes, on the incidence of AEs, on the discounting rate                            |
| Wu and al., 2007[56]    | Medication-associated AEs        | Multiple data sources: a) 1 hospital group (700 beds), 27800 stays (all the patients included), b) Published data                                                                              | Electronic ordering and administration system implementation                 | Cost-effectiveness analysis | HCO             | Averted medication errors                                                                         | Published data                | 1) Empirical data: hardware, training sessions, staff time; 2) Published data: AEs averted                                                                      | Yes, on the incidence of AEs, on the effectiveness rate, on personnel costs      |

\*HAI: Healthcare associated infection

†HCO: Healthcare institutions

‡HCW: Healthcare workers

‡ICU: Intensive care unit

¶CPOE: Computerized physician order entry

\*\*MRSA: Methicillin resistant *Staphylococcus aureus*

††QALY: Quality adjusted life year
